# Supplementary material
Source: publisher figshare collection journal article supplement (https://acs.figshare.com/ndownloader/files/25912134)
Supplement: Supplementary file 1 [file 25912134]

# **Facile fabrication of a flexible patterned film with diverse micro-/nanostructures via electrohydrodynamic patterning**

Guowei Lv,<sup>a</sup> Xiaobing Hu,<sup>b</sup> Lu Hao,<sup>a</sup> Hongmiao Tian,<sup>c</sup> Jinyou Shao<sup>c</sup> and Demei Yu<sup>a,\*</sup>

<sup>a</sup> School of Chemistry, State Key Laboratory of Electrical Insulation and Power Equipments, MOE Key Laboratory for Non-Equilibrium Synthesis and Modulation of Condensed Matter, Xi'an Jiaotong University, Xi'an 710049, Shaanxi, P. R. China

<sup>b</sup> College of Chemistry and Chemical Engineering, Shaanxi Province Key Laboratory of Phytochemistry, Baoji University of Arts and Sciences, Baoji 721013, Shaanxi, P. R. China

<sup>c</sup> State Key Laboratory of Manufacturing Systems Engineering, Xi'an Jiaotong University, Xi'an 710049, Shaanxi, P. R. China

## **Film thickness vs rotational speed for SCPR film**

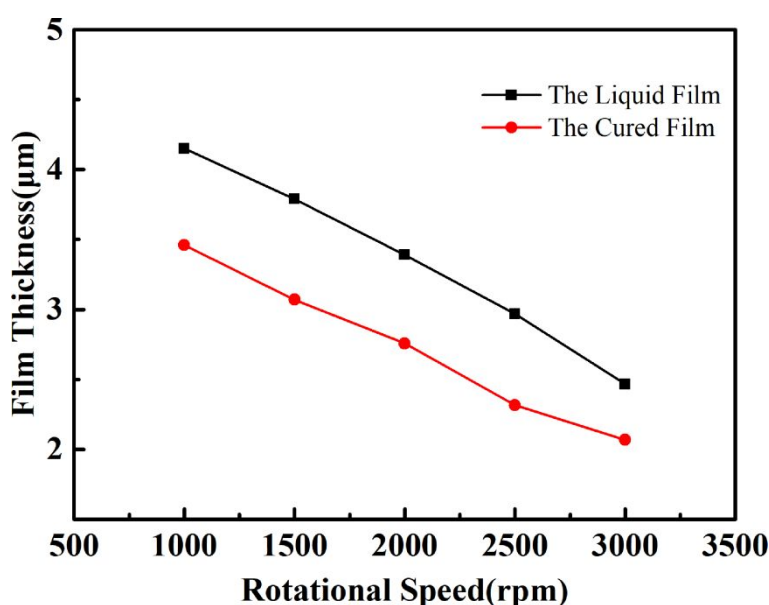

**Fig. S1.**  $h$  vs  $n$  for SCPR film with  $n = 1000$  rpm, 1500 rpm, 2000 rpm, 25000 rpm and 3000rpm, respectively.

## **EHDP of SCPR**

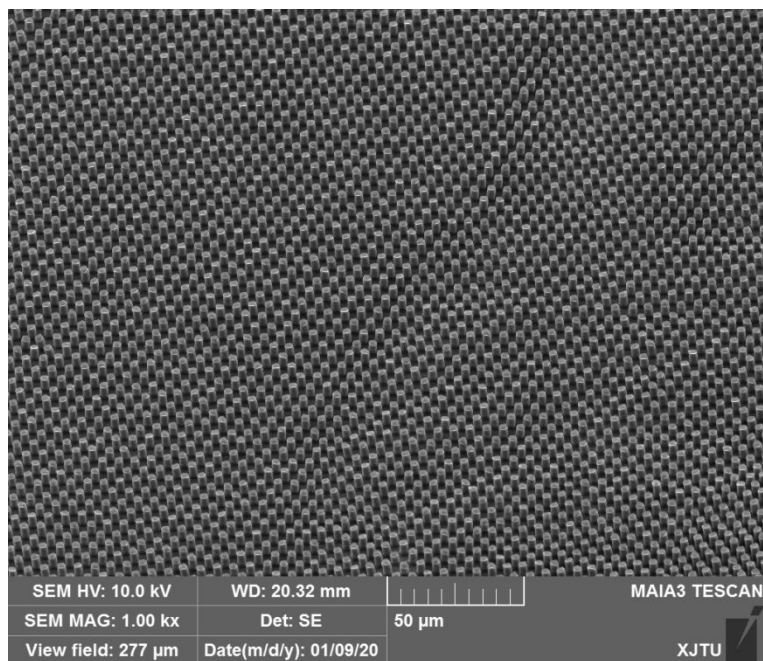

**Fig. S2.** SEM images of EAP on a flexible ITO-coated PET film for SCPR film.
